# Supplementary material
Source: PubMed Central journal article supplement (PMC5796873)

Supporting Information for “The TLR9 agonist MGN1703 triggers a potent type I interferon response in the sigmoid colon” by Krarup, Abdel-Mohsen, Schleimann, *et al.*

| <b>Table S1 (continued on multiple pages). Significantly regulated genes from RNASeq analysis of intestinal mononuclear cells.</b> |          |          |                                            |                                        |
|------------------------------------------------------------------------------------------------------------------------------------|----------|----------|--------------------------------------------|----------------------------------------|
| #                                                                                                                                  | Name     | p value* | p value adjusted for false discovery rate^ | log2-fold- change (treatment/baseline) |
| 1                                                                                                                                  | IFI27    | 1.15E-08 | 7.97E-05                                   | -2.430314241                           |
| 2                                                                                                                                  | OAS1     | 9.31E-09 | 7.97E-05                                   | -2.287057906                           |
| 3                                                                                                                                  | IFITM1   | 3.21E-08 | 8.92E-05                                   | -2.041336871                           |
| 4                                                                                                                                  | IFI6     | 3.00E-08 | 8.92E-05                                   | -3.719797937                           |
| 5                                                                                                                                  | HERC6    | 2.86E-08 | 8.92E-05                                   | -2.127016974                           |
| 6                                                                                                                                  | IRF9     | 4.81E-08 | 8.96E-05                                   | -1.15975609                            |
| 7                                                                                                                                  | XAF1     | 5.16E-08 | 8.96E-05                                   | -3.138333563                           |
| 8                                                                                                                                  | OAS2     | 4.48E-08 | 8.96E-05                                   | -2.20610977                            |
| 9                                                                                                                                  | MX1      | 1.12E-07 | 1.73E-04                                   | -3.023753645                           |
| 10                                                                                                                                 | EIF2AK2  | 1.65E-07 | 2.30E-04                                   | -1.580238143                           |
| 11                                                                                                                                 | IFI44L   | 2.60E-07 | 3.02E-04                                   | -4.766144209                           |
| 12                                                                                                                                 | PARP9    | 3.51E-07 | 3.75E-04                                   | -2.036965696                           |
| 13                                                                                                                                 | ISG15    | 8.46E-07 | 8.40E-04                                   | -3.032851779                           |
| 14                                                                                                                                 | PRR15    | 9.17E-07 | 8.50E-04                                   | -1.075908931                           |
| 15                                                                                                                                 | IFI44    | 1.28E-06 | 9.39E-04                                   | -2.807789174                           |
| 16                                                                                                                                 | CAMK2N1  | 1.25E-06 | 9.39E-04                                   | -1.632563818                           |
| 17                                                                                                                                 | OAS3     | 1.50E-06 | 9.51E-04                                   | -2.538528456                           |
| 18                                                                                                                                 | IL17RE   | 1.47E-06 | 9.51E-04                                   | -1.468018636                           |
| 19                                                                                                                                 | IFI35    | 2.69E-06 | 1.56E-03                                   | -1.282126812                           |
| 20                                                                                                                                 | LY6E     | 3.13E-06 | 1.67E-03                                   | -1.912375056                           |
| 21                                                                                                                                 | USP18    | 3.02E-06 | 1.67E-03                                   | -2.401140199                           |
| 22                                                                                                                                 | ACTN4    | 3.59E-06 | 1.85E-03                                   | -1.124444868                           |
| 23                                                                                                                                 | IFIT1    | 5.46E-06 | 2.30E-03                                   | -3.219484671                           |
| 24                                                                                                                                 | DDX58    | 7.34E-06 | 2.76E-03                                   | -1.383124633                           |
| 25                                                                                                                                 | CHPF     | 8.20E-06 | 2.86E-03                                   | 1.134025899                            |
| 26                                                                                                                                 | RSAD2    | 1.04E-05 | 3.45E-03                                   | -2.843705122                           |
| 27                                                                                                                                 | AGRN     | 1.40E-05 | 4.37E-03                                   | -1.234860759                           |
| 28                                                                                                                                 | HELZ2    | 1.66E-05 | 4.80E-03                                   | -1.672723117                           |
| 29                                                                                                                                 | TSPAN1   | 1.96E-05 | 4.93E-03                                   | -1.276393792                           |
| 30                                                                                                                                 | STAT1    | 1.87E-05 | 4.93E-03                                   | -1.27057515                            |
| 31                                                                                                                                 | UBE2L6   | 2.01E-05 | 4.93E-03                                   | -1.059722782                           |
| 32                                                                                                                                 | DTX3L    | 2.39E-05 | 5.22E-03                                   | -1.270663518                           |
| 33                                                                                                                                 | FXVD3    | 2.67E-05 | 5.37E-03                                   | -1.044109986                           |
| 34                                                                                                                                 | PRSS3    | 2.74E-05 | 5.45E-03                                   | -1.197766746                           |
| 35                                                                                                                                 | NHSL1    | 2.97E-05 | 5.66E-03                                   | -1.058114364                           |
| 36                                                                                                                                 | TPST2    | 3.28E-05 | 5.67E-03                                   | 1.046302586                            |
| 37                                                                                                                                 | WDR54    | 3.24E-05 | 5.67E-03                                   | 1.086859449                            |
| 38                                                                                                                                 | CMPK2    | 3.30E-05 | 5.67E-03                                   | -2.510841825                           |
| 39                                                                                                                                 | LAMP3    | 3.24E-05 | 5.67E-03                                   | -1.581895604                           |
| 40                                                                                                                                 | BHLHA15  | 3.44E-05 | 5.67E-03                                   | 1.267991751                            |
| 41                                                                                                                                 | MARVELD3 | 3.51E-05 | 5.67E-03                                   | -1.101657822                           |
| 42                                                                                                                                 | SAMD9L   | 3.89E-05 | 6.10E-03                                   | -1.304646251                           |
| 43                                                                                                                                 | SPINK5   | 4.20E-05 | 6.34E-03                                   | -1.25582451                            |
| 44                                                                                                                                 | TMEM54   | 4.80E-05 | 6.81E-03                                   | -1.094761959                           |

Supporting Information for “The TLR9 agonist MGN1703 triggers a potent type I interferon response in the sigmoid colon” by Krarup, Abdel-Mohsen, Schleimann, *et al.*

| <b>Table S1 (continued on multiple pages). Significantly regulated genes from RNASeq analysis of intestinal mononuclear cells.</b> |           |          |                                            |                                        |
|------------------------------------------------------------------------------------------------------------------------------------|-----------|----------|--------------------------------------------|----------------------------------------|
| #                                                                                                                                  | Name      | p value* | p value adjusted for false discovery rate^ | log2-fold- change (treatment/baseline) |
| 45                                                                                                                                 | QPCT      | 5.32E-05 | 7.05E-03                                   | 1.078605003                            |
| 46                                                                                                                                 | SEMA4G    | 5.22E-05 | 7.05E-03                                   | -1.185756496                           |
| 47                                                                                                                                 | NXPE2     | 5.67E-05 | 7.37E-03                                   | -1.118165053                           |
| 48                                                                                                                                 | TRIM22    | 5.86E-05 | 7.51E-03                                   | -1.273075211                           |
| 49                                                                                                                                 | BTNL3     | 5.98E-05 | 7.56E-03                                   | -1.562435368                           |
| 50                                                                                                                                 | DDX60     | 6.82E-05 | 8.12E-03                                   | -2.106045391                           |
| 51                                                                                                                                 | MEI1      | 6.63E-05 | 8.12E-03                                   | 1.248405594                            |
| 52                                                                                                                                 | NOS1AP    | 6.82E-05 | 8.12E-03                                   | -1.016866875                           |
| 53                                                                                                                                 | PCLO      | 7.20E-05 | 8.28E-03                                   | -1.250735256                           |
| 54                                                                                                                                 | KIAA1211L | 7.57E-05 | 8.52E-03                                   | -1.013592713                           |
| 55                                                                                                                                 | ANGPTL6   | 8.21E-05 | 8.93E-03                                   | -1.143923952                           |
| 56                                                                                                                                 | HNF1B     | 8.62E-05 | 9.29E-03                                   | -1.020475057                           |
| 57                                                                                                                                 | PRR15L    | 9.30E-05 | 9.31E-03                                   | -1.135064056                           |
| 58                                                                                                                                 | HOXB9     | 8.70E-05 | 9.31E-03                                   | -1.251806522                           |
| 59                                                                                                                                 | DDX60L    | 8.90E-05 | 9.31E-03                                   | -1.183983707                           |
| 60                                                                                                                                 | DHX58     | 8.87E-05 | 9.31E-03                                   | -1.68500251                            |
| 61                                                                                                                                 | NEURL1B   | 9.27E-05 | 9.31E-03                                   | -1.065921385                           |
| 62                                                                                                                                 | IFIT3     | 9.72E-05 | 9.39E-03                                   | -2.734323502                           |
| 63                                                                                                                                 | MX2       | 1.01E-04 | 9.58E-03                                   | -1.840242803                           |
| 64                                                                                                                                 | FCER1A    | 1.03E-04 | 9.59E-03                                   | 1.18004276                             |
| 65                                                                                                                                 | SPIRE2    | 1.26E-04 | 1.08E-02                                   | -1.040696415                           |
| 66                                                                                                                                 | CASC9     | 1.32E-04 | 1.10E-02                                   | -1.364409674                           |
| 67                                                                                                                                 | GPA33     | 1.42E-04 | 1.15E-02                                   | -1.07675672                            |
| 68                                                                                                                                 | EPSTI1    | 1.48E-04 | 1.16E-02                                   | -1.857638044                           |
| 69                                                                                                                                 | PCK1      | 1.52E-04 | 1.18E-02                                   | -1.426715071                           |
| 70                                                                                                                                 | RAPGEF1   | 1.57E-04 | 1.19E-02                                   | 1.263903842                            |
| 71                                                                                                                                 | SMIM22    | 1.67E-04 | 1.23E-02                                   | -1.16558075                            |
| 72                                                                                                                                 | IRF7      | 1.73E-04 | 1.23E-02                                   | -1.536975754                           |
| 73                                                                                                                                 | MOV10     | 1.75E-04 | 1.23E-02                                   | -1.036391307                           |
| 74                                                                                                                                 | TMC5      | 1.76E-04 | 1.23E-02                                   | -1.29657681                            |
| 75                                                                                                                                 | SLC4A4    | 1.70E-04 | 1.23E-02                                   | -1.095921595                           |
| 76                                                                                                                                 | MT1E      | 1.84E-04 | 1.27E-02                                   | -1.022426106                           |
| 77                                                                                                                                 | PLSCR1    | 1.89E-04 | 1.27E-02                                   | -1.373579611                           |
| 78                                                                                                                                 | MTRNR2L3  | 1.92E-04 | 1.27E-02                                   | -1.320865303                           |
| 79                                                                                                                                 | ZG16B     | 1.83E-04 | 1.27E-02                                   | -1.048190454                           |
| 80                                                                                                                                 | TLR9      | 1.94E-04 | 1.27E-02                                   | 1.066609961                            |
| 81                                                                                                                                 | BTC       | 1.88E-04 | 1.27E-02                                   | -1.368298281                           |
| 82                                                                                                                                 | PARP12    | 2.07E-04 | 1.30E-02                                   | -1.687774812                           |
| 83                                                                                                                                 | WNT10A    | 2.13E-04 | 1.33E-02                                   | 1.282118433                            |
| 84                                                                                                                                 | PRAP1     | 2.13E-04 | 1.33E-02                                   | -1.603020181                           |
| 85                                                                                                                                 | MTRNR2L6  | 2.27E-04 | 1.37E-02                                   | -1.25971512                            |
| 86                                                                                                                                 | CLDN8     | 2.28E-04 | 1.37E-02                                   | -1.259474265                           |
| 87                                                                                                                                 | CADM1     | 2.31E-04 | 1.38E-02                                   | 1.029791617                            |
| 88                                                                                                                                 | ODF3B     | 2.36E-04 | 1.40E-02                                   | -1.304580079                           |

Supporting Information for “The TLR9 agonist MGN1703 triggers a potent type I interferon response in the sigmoid colon” by Krarup, Abdel-Mohsen, Schleimann, *et al.*

**Table S1 (continued on multiple pages). Significantly regulated genes from RNASeq analysis of intestinal mononuclear cells.**

| #   | Name       | p value* | p value adjusted for false discovery rate^ | log2-fold- change (treatment/baseline) |
|-----|------------|----------|--------------------------------------------|----------------------------------------|
| 89  | CDHR5      | 2.41E-04 | 1.41E-02                                   | -1.255228856                           |
| 90  | CEACAM7    | 2.44E-04 | 1.41E-02                                   | -1.854918983                           |
| 91  | ETV7       | 2.52E-04 | 1.43E-02                                   | -1.327311504                           |
| 92  | KLF5       | 2.63E-04 | 1.47E-02                                   | -1.324400405                           |
| 93  | NUPR1      | 2.81E-04 | 1.50E-02                                   | -1.031354712                           |
| 94  | MUC20      | 2.82E-04 | 1.50E-02                                   | -1.255470337                           |
| 95  | GSDMB      | 2.72E-04 | 1.50E-02                                   | -1.403602159                           |
| 96  | SLC26A3    | 2.84E-04 | 1.50E-02                                   | -1.347006378                           |
| 97  | DERL3      | 2.92E-04 | 1.53E-02                                   | 1.066391248                            |
| 98  | MB21D2     | 2.94E-04 | 1.53E-02                                   | 1.264216064                            |
| 99  | ASAP2      | 2.93E-04 | 1.53E-02                                   | -1.113008362                           |
| 100 | FUT6       | 3.01E-04 | 1.54E-02                                   | -1.400066329                           |
| 101 | CDKN2B-AS1 | 3.06E-04 | 1.54E-02                                   | -1.435344765                           |
| 102 | MTRNR2L2   | 3.19E-04 | 1.57E-02                                   | -1.304780204                           |
| 103 | TMPRSS4    | 3.18E-04 | 1.57E-02                                   | -1.018236677                           |
| 104 | PELI1      | 3.26E-04 | 1.57E-02                                   | 1.169426422                            |
| 105 | HSD11B2    | 3.29E-04 | 1.57E-02                                   | -1.206979759                           |
| 106 | PLEKHG6    | 3.23E-04 | 1.57E-02                                   | -1.547503135                           |
| 107 | CDC42EP5   | 3.39E-04 | 1.59E-02                                   | -1.257922771                           |
| 108 | SAMD5      | 3.90E-04 | 1.67E-02                                   | -1.04391697                            |
| 109 | TBC1D9     | 3.91E-04 | 1.67E-02                                   | 1.013708447                            |
| 110 | KRT20      | 4.04E-04 | 1.67E-02                                   | -1.076903401                           |
| 111 | MEP1A      | 4.07E-04 | 1.67E-02                                   | -1.148264089                           |
| 112 | PHGR1      | 4.24E-04 | 1.71E-02                                   | -1.132063673                           |
| 113 | DAPP1      | 4.30E-04 | 1.72E-02                                   | 1.275165088                            |
| 114 | FABP1      | 4.54E-04 | 1.78E-02                                   | -1.11331536                            |
| 115 | IL1RL1     | 4.56E-04 | 1.78E-02                                   | 1.073360132                            |
| 116 | LGALS9     | 4.55E-04 | 1.78E-02                                   | -1.060547729                           |
| 117 | RRAD       | 4.67E-04 | 1.80E-02                                   | 1.108924524                            |
| 118 | BCL2L11    | 4.78E-04 | 1.83E-02                                   | 1.123958845                            |
| 119 | TLN2       | 4.88E-04 | 1.85E-02                                   | -1.031408557                           |
| 120 | TSHR       | 4.93E-04 | 1.86E-02                                   | 1.690813172                            |
| 121 | MGAT4B     | 4.98E-04 | 1.87E-02                                   | -1.013495827                           |
| 122 | CEACAM3    | 4.99E-04 | 1.87E-02                                   | -1.590164553                           |
| 123 | ZNF804A    | 5.32E-04 | 1.95E-02                                   | 1.186313196                            |
| 124 | MAGIX      | 5.45E-04 | 1.97E-02                                   | -1.062842732                           |
| 125 | SAMD9      | 5.58E-04 | 1.98E-02                                   | -1.123457276                           |
| 126 | CCR10      | 5.66E-04 | 1.99E-02                                   | 1.06333957                             |
| 127 | HSPA13     | 5.71E-04 | 2.01E-02                                   | 1.019547736                            |
| 128 | CCL28      | 5.79E-04 | 2.01E-02                                   | -1.072557867                           |
| 129 | EDN3       | 6.13E-04 | 2.07E-02                                   | -1.235813252                           |
| 130 | BCL2L14    | 6.29E-04 | 2.09E-02                                   | -1.205681527                           |
| 131 | SCARNA9L   | 6.29E-04 | 2.09E-02                                   | -3.522611362                           |
| 132 | MT1G       | 6.52E-04 | 2.13E-02                                   | -1.195707835                           |

Supporting Information for “The TLR9 agonist MGN1703 triggers a potent type I interferon response in the sigmoid colon” by Krarup, Abdel-Mohsen, Schleimann, *et al.*

| <b>Table S1 (continued on multiple pages). Significantly regulated genes from RNASeq analysis of intestinal mononuclear cells.</b> |           |          |                                                        |                                        |
|------------------------------------------------------------------------------------------------------------------------------------|-----------|----------|--------------------------------------------------------|----------------------------------------|
| #                                                                                                                                  | Name      | p value* | p value adjusted for false discovery rate <sup>^</sup> | log2-fold- change (treatment/baseline) |
| 133                                                                                                                                | VSIG2     | 6.63E-04 | 2.15E-02                                               | -1.077996113                           |
| 134                                                                                                                                | CES3      | 6.79E-04 | 2.16E-02                                               | -1.136735223                           |
| 135                                                                                                                                | MTRNR2L1  | 6.98E-04 | 2.21E-02                                               | -1.26894469                            |
| 136                                                                                                                                | CA4       | 7.14E-04 | 2.22E-02                                               | -1.465851352                           |
| 137                                                                                                                                | MTRNR2L8  | 7.25E-04 | 2.23E-02                                               | -1.229280059                           |
| 138                                                                                                                                | BEST4     | 7.31E-04 | 2.23E-02                                               | -1.289010182                           |
| 139                                                                                                                                | PTPRK     | 7.52E-04 | 2.28E-02                                               | -1.046698018                           |
| 140                                                                                                                                | C19orf33  | 7.61E-04 | 2.29E-02                                               | -1.333357016                           |
| 141                                                                                                                                | GALNT12   | 7.99E-04 | 2.33E-02                                               | -1.34980749                            |
| 142                                                                                                                                | GPR125    | 8.22E-04 | 2.38E-02                                               | -1.202847521                           |
| 143                                                                                                                                | EIF2AK3   | 8.45E-04 | 2.39E-02                                               | 1.050736914                            |
| 144                                                                                                                                | NBEAL1    | 8.37E-04 | 2.39E-02                                               | -1.078415727                           |
| 145                                                                                                                                | CEACAM1   | 8.50E-04 | 2.39E-02                                               | -1.07265358                            |
| 146                                                                                                                                | PLA2G10   | 8.36E-04 | 2.39E-02                                               | -1.277099496                           |
| 147                                                                                                                                | MOXD1     | 8.30E-04 | 2.39E-02                                               | 1.159965015                            |
| 148                                                                                                                                | OTOP2     | 8.43E-04 | 2.39E-02                                               | -1.113053841                           |
| 149                                                                                                                                | SLC8A3    | 8.44E-04 | 2.39E-02                                               | 1.026961707                            |
| 150                                                                                                                                | HDC       | 8.71E-04 | 2.41E-02                                               | 1.115724188                            |
| 151                                                                                                                                | XDH       | 8.68E-04 | 2.41E-02                                               | -1.073049815                           |
| 152                                                                                                                                | CAPN8     | 8.89E-04 | 2.44E-02                                               | -1.31025888                            |
| 153                                                                                                                                | TRPM6     | 8.90E-04 | 2.44E-02                                               | -1.528944957                           |
| 154                                                                                                                                | PDGFA     | 9.05E-04 | 2.46E-02                                               | -1.226149504                           |
| 155                                                                                                                                | PTPRH     | 9.20E-04 | 2.48E-02                                               | -1.054044336                           |
| 156                                                                                                                                | PARVB     | 9.29E-04 | 2.49E-02                                               | 1.022474101                            |
| 157                                                                                                                                | BCAS1     | 9.38E-04 | 2.50E-02                                               | -1.016886919                           |
| 158                                                                                                                                | LYPD8     | 9.63E-04 | 2.53E-02                                               | -1.533570942                           |
| 159                                                                                                                                | SMOX      | 9.74E-04 | 2.55E-02                                               | 1.063304552                            |
| 160                                                                                                                                | MOB3B     | 9.79E-04 | 2.55E-02                                               | -2.656346794                           |
| 161                                                                                                                                | MTRNR2L9  | 9.87E-04 | 2.56E-02                                               | -1.209462548                           |
| 162                                                                                                                                | SLC25A34  | 1.01E-03 | 2.57E-02                                               | -1.091704235                           |
| 163                                                                                                                                | FERMT1    | 1.05E-03 | 2.60E-02                                               | -1.00291516                            |
| 164                                                                                                                                | CCDC64B   | 1.08E-03 | 2.64E-02                                               | -1.216928173                           |
| 165                                                                                                                                | CD177     | 1.09E-03 | 2.67E-02                                               | -1.184461824                           |
| 166                                                                                                                                | B3GALT5   | 1.10E-03 | 2.68E-02                                               | -1.478014827                           |
| 167                                                                                                                                | MTRNR2L10 | 1.13E-03 | 2.70E-02                                               | -1.250576369                           |
| 168                                                                                                                                | SLC51B    | 1.14E-03 | 2.70E-02                                               | -1.073617478                           |
| 169                                                                                                                                | CD207     | 1.15E-03 | 2.70E-02                                               | 1.795526582                            |
| 170                                                                                                                                | IFIT5     | 1.17E-03 | 2.74E-02                                               | -1.327705562                           |
| 171                                                                                                                                | BTNL8     | 1.24E-03 | 2.78E-02                                               | -1.340071801                           |
| 172                                                                                                                                | LLGL2     | 1.32E-03 | 2.91E-02                                               | -1.052332269                           |
| 173                                                                                                                                | FAM49A    | 1.33E-03 | 2.91E-02                                               | 1.245991767                            |
| 174                                                                                                                                | HIST1H4D  | 1.33E-03 | 2.91E-02                                               | -1.529024564                           |
| 175                                                                                                                                | CA1       | 1.35E-03 | 2.94E-02                                               | -1.191487408                           |
| 176                                                                                                                                | FBXL8     | 1.36E-03 | 2.95E-02                                               | -1.011746401                           |

Supporting Information for “The TLR9 agonist MGN1703 triggers a potent type I interferon response in the sigmoid colon” by Krarup, Abdel-Mohsen, Schleimann, *et al.*

**Table S1 (continued on multiple pages). Significantly regulated genes from RNASeq analysis of intestinal mononuclear cells.**

| #   | Name       | p value* | p value adjusted for false discovery rate^ | log2-fold- change (treatment/baseline) |
|-----|------------|----------|--------------------------------------------|----------------------------------------|
| 177 | HSF4       | 1.36E-03 | 2.95E-02                                   | -1.011746401                           |
| 178 | TRAF1      | 1.37E-03 | 2.95E-02                                   | 1.018467097                            |
| 179 | A1CF       | 1.36E-03 | 2.95E-02                                   | -1.002130271                           |
| 180 | B3GNT8     | 1.38E-03 | 2.97E-02                                   | -1.018782633                           |
| 181 | RHBDL2     | 1.40E-03 | 2.99E-02                                   | -1.212034111                           |
| 182 | BCL2L15    | 1.42E-03 | 3.01E-02                                   | -1.14907254                            |
| 183 | LRRC19     | 1.45E-03 | 3.06E-02                                   | -1.196523323                           |
| 184 | HHLA2      | 1.48E-03 | 3.07E-02                                   | -1.132864453                           |
| 185 | IGLL5      | 1.53E-03 | 3.10E-02                                   | 1.065539924                            |
| 186 | PNOC       | 1.53E-03 | 3.10E-02                                   | 1.290032701                            |
| 187 | LGR4       | 1.57E-03 | 3.14E-02                                   | -1.053612925                           |
| 188 | MUC12      | 1.60E-03 | 3.18E-02                                   | -1.103552296                           |
| 189 | GAL3ST2    | 1.62E-03 | 3.18E-02                                   | -1.213909898                           |
| 190 | SOWAHA     | 1.62E-03 | 3.18E-02                                   | -1.042315194                           |
| 191 | SERPINE1   | 1.65E-03 | 3.22E-02                                   | 1.186790681                            |
| 192 | CHST2      | 1.66E-03 | 3.22E-02                                   | 1.062433629                            |
| 193 | CEBPA      | 1.66E-03 | 3.22E-02                                   | -1.358814803                           |
| 194 | HNF4A      | 1.68E-03 | 3.25E-02                                   | -1.086008563                           |
| 195 | LGALS3BP   | 1.71E-03 | 3.28E-02                                   | -1.102679453                           |
| 196 | MS4A12     | 1.76E-03 | 3.33E-02                                   | -2.545266366                           |
| 197 | ITPKA      | 1.77E-03 | 3.33E-02                                   | -1.587024471                           |
| 198 | PART1      | 1.77E-03 | 3.33E-02                                   | -1.120544829                           |
| 199 | MOGAT2     | 1.86E-03 | 3.44E-02                                   | -1.235029097                           |
| 200 | NR112      | 1.98E-03 | 3.56E-02                                   | -1.003646195                           |
| 201 | CYP2B6     | 1.98E-03 | 3.56E-02                                   | -1.098258341                           |
| 202 | OASL       | 2.06E-03 | 3.66E-02                                   | -1.360298796                           |
| 203 | SLC7A5     | 2.08E-03 | 3.67E-02                                   | 1.054631313                            |
| 204 | FCRL5      | 2.07E-03 | 3.67E-02                                   | 1.095499923                            |
| 205 | KIF13A     | 2.08E-03 | 3.67E-02                                   | -1.428602831                           |
| 206 | FRMD1      | 2.15E-03 | 3.75E-02                                   | -1.220576177                           |
| 207 | CHRM3      | 2.17E-03 | 3.75E-02                                   | -1.123362825                           |
| 208 | PKDCC      | 2.19E-03 | 3.75E-02                                   | -1.29329248                            |
| 209 | PIGZ       | 2.23E-03 | 3.79E-02                                   | -1.429099512                           |
| 210 | GATA6      | 2.25E-03 | 3.81E-02                                   | -1.119256506                           |
| 211 | MAB21L3    | 2.30E-03 | 3.81E-02                                   | -1.025554629                           |
| 212 | PITPNM3    | 2.29E-03 | 3.81E-02                                   | -1.060928377                           |
| 213 | IL23A      | 2.31E-03 | 3.82E-02                                   | 1.425404537                            |
| 214 | JHDM1D-AS1 | 2.37E-03 | 3.88E-02                                   | -1.10061894                            |
| 215 | FAM177B    | 2.38E-03 | 3.88E-02                                   | -1.385137339                           |
| 216 | GPM6A      | 2.47E-03 | 3.98E-02                                   | 1.591826754                            |
| 217 | RMRP       | 2.50E-03 | 3.99E-02                                   | -1.06633084                            |
| 218 | ARHGEF10L  | 2.52E-03 | 4.02E-02                                   | -1.242340958                           |
| 219 | SULT1B1    | 2.55E-03 | 4.04E-02                                   | -1.260138164                           |
| 220 | CEACAM6    | 2.56E-03 | 4.05E-02                                   | -1.212491009                           |

Supporting Information for “The TLR9 agonist MGN1703 triggers a potent type I interferon response in the sigmoid colon” by Krarup, Abdel-Mohsen, Schleimann, *et al.*

**Table S1 (continued on multiple pages). Significantly regulated genes from RNASeq analysis of intestinal mononuclear cells.**

| #   | Name     | p value* | p value adjusted for false discovery rate <sup>^</sup> | log2-fold- change (treatment/baseline) |
|-----|----------|----------|--------------------------------------------------------|----------------------------------------|
| 221 | B4GALNT3 | 2.57E-03 | 4.05E-02                                               | -1.232077064                           |
| 222 | CCDC88A  | 2.74E-03 | 4.22E-02                                               | 1.001852606                            |
| 223 | ABHD17C  | 2.84E-03 | 4.29E-02                                               | -1.198963989                           |
| 224 | CD1C     | 2.85E-03 | 4.30E-02                                               | 1.500612093                            |
| 225 | KLK15    | 2.86E-03 | 4.30E-02                                               | -1.814149089                           |
| 226 | RNU6-28P | 2.91E-03 | 4.32E-02                                               | -7.067681587                           |
| 227 | C21orf88 | 2.93E-03 | 4.35E-02                                               | -1.764848948                           |
| 228 | HERC5    | 3.00E-03 | 4.41E-02                                               | -1.097912254                           |
| 229 | TP53INP1 | 3.02E-03 | 4.41E-02                                               | 1.118630388                            |
| 230 | TMEM150B | 3.17E-03 | 4.55E-02                                               | -2.003230683                           |
| 231 | GUCA2A   | 3.18E-03 | 4.56E-02                                               | -1.524395819                           |
| 232 | ITGA8    | 3.28E-03 | 4.64E-02                                               | 1.033983647                            |
| 233 | ZNF69    | 3.33E-03 | 4.67E-02                                               | -1.249617121                           |
| 234 | HOOK2    | 3.40E-03 | 4.71E-02                                               | -1.529601723                           |
| 235 | OSR2     | 3.40E-03 | 4.71E-02                                               | 1.243263288                            |
| 236 | RNF186   | 3.42E-03 | 4.72E-02                                               | -1.037261361                           |
| 237 | CYP2C18  | 3.43E-03 | 4.73E-02                                               | -1.318672309                           |
| 238 | NR5A2    | 3.51E-03 | 4.80E-02                                               | -1.106897876                           |
| 239 | MYO1A    | 3.53E-03 | 4.80E-02                                               | -1.001161905                           |
| 240 | WDR78    | 3.60E-03 | 4.82E-02                                               | -1.208287889                           |
| 241 | GDA      | 3.64E-03 | 4.84E-02                                               | -1.259760582                           |
| 242 | HOMER1   | 3.65E-03 | 4.85E-02                                               | 1.137522678                            |
| 243 | AKR1C3   | 3.66E-03 | 4.85E-02                                               | -1.08762426                            |
| 244 | FLT3     | 3.69E-03 | 4.87E-02                                               | 1.513218014                            |
| 245 | ATP2C2   | 3.76E-03 | 4.92E-02                                               | -1.13714097                            |
| 246 | SLC17A4  | 3.84E-03 | 4.98E-02                                               | -2.266032814                           |
| 247 | PLEKHA6  | 3.86E-03 | 4.98E-02                                               | -1.169073167                           |
| 248 | CD1E     | 3.86E-03 | 4.98E-02                                               | 2.223412249                            |

\* Wilcoxon signed-rank tests were used to determine statistical significance between on-treatment time point and the baseline time point.  
<sup>^</sup> False discovery rates (FDR) were computed using the Benjamini-Hochberg procedure to adjust for multiple comparisons.

Supporting Information for “The TLR9 agonist MGN1703 triggers a potent type I interferon response in the sigmoid colon” by Krarup, Abdel-Mohsen, Schleimann, *et al.*

| <b>Table S2 (continued on multiple pages). Fecal relative abundance of sequences derived from individual taxa</b> |                            |                          |                  |                         |
|-------------------------------------------------------------------------------------------------------------------|----------------------------|--------------------------|------------------|-------------------------|
| <b>Taxonomic Rank</b>                                                                                             | <b>P-Value<sup>a</sup></b> | <b>FDR-P<sup>b</sup></b> | <b>BL # Seqs</b> | <b>Treatment # Seqs</b> |
| <b>Phylum</b>                                                                                                     |                            |                          |                  |                         |
| Firmicutes                                                                                                        | 0.21                       | 0.83                     | 10223.75         | 9056.00                 |
| Bacteroidetes                                                                                                     | 0.60                       | 0.83                     | 2459.13          | 2925.00                 |
| Proteobacteria                                                                                                    | 0.67                       | 0.83                     | 786.00           | 1046.75                 |
| Actinobacteria                                                                                                    | 0.83                       | 0.83                     | 745.75           | 928.13                  |
| <b>Class</b>                                                                                                      |                            |                          |                  |                         |
| Clostridia                                                                                                        | 0.25                       | 0.80                     | 9217.25          | 7890.75                 |
| Erysipelotrichi                                                                                                   | 0.29                       | 0.80                     | 658.88           | 878.50                  |
| Coriobacteriia                                                                                                    | 0.34                       | 0.80                     | 494.00           | 571.50                  |
| Bacteroidia                                                                                                       | 0.60                       | 0.87                     | 2461.00          | 2950.75                 |
| Bacilli                                                                                                           | 0.83                       | 0.87                     | 338.88           | 307.88                  |
| Gammaproteobacteria                                                                                               | 0.83                       | 0.87                     | 672.38           | 754.88                  |
| Actinobacteria                                                                                                    | 0.87                       | 0.87                     | 254.88           | 338.88                  |
| <b>Order</b>                                                                                                      |                            |                          |                  |                         |
| Clostridiales                                                                                                     | 0.25                       | 0.92                     | 9219.00          | 7910.38                 |
| Erysipelotrichales                                                                                                | 0.34                       | 0.92                     | 659.25           | 877.38                  |
| Coriobacteriales                                                                                                  | 0.43                       | 0.92                     | 503.63           | 576.38                  |
| Bacteroidales                                                                                                     | 0.60                       | 0.92                     | 2454.38          | 2924.13                 |
| Aeromonadales                                                                                                     | 0.83                       | 0.92                     | 409.50           | 696.25                  |
| Bifidobacteriales                                                                                                 | 0.87                       | 0.92                     | 251.75           | 328.13                  |
| Lactobacillales                                                                                                   | 0.92                       | 0.92                     | 312.63           | 278.50                  |
| <b>Family</b>                                                                                                     |                            |                          |                  |                         |
| Coriobacteriaceae                                                                                                 | 0.40                       | 0.96                     | 496.63           | 598.50                  |
| Erysipelotrichaceae                                                                                               | 0.40                       | 0.96                     | 661.50           | 857.00                  |
| Bacteroidaceae                                                                                                    | 0.53                       | 0.96                     | 1148.00          | 1369.50                 |
| Lachnospiraceae                                                                                                   | 0.53                       | 0.96                     | 2937.13          | 2448.63                 |
| Ruminococcaceae                                                                                                   | 0.53                       | 0.96                     | 3592.63          | 3108.50                 |
| Bifidobacteriaceae                                                                                                | 0.60                       | 0.96                     | 245.50           | 337.38                  |
| Rikenellaceae                                                                                                     | 0.60                       | 0.96                     | 126.63           | 220.63                  |
| Clostridiaceae                                                                                                    | 0.64                       | 0.96                     | 210.88           | 242.63                  |
| Succinivibrionaceae                                                                                               | 0.74                       | 0.96                     | 405.38           | 708.25                  |
| Lactobacillaceae                                                                                                  | 0.75                       | 0.96                     | 192.63           | 145.88                  |
| Prevotellaceae                                                                                                    | 0.87                       | 0.96                     | 691.13           | 817.25                  |
| Veillonellaceae                                                                                                   | 0.92                       | 0.96                     | 814.50           | 625.63                  |
| [Paraprevotellaceae]                                                                                              | 0.96                       | 0.96                     | 135.13           | 174.88                  |
| <b>Genus</b>                                                                                                      |                            |                          |                  |                         |
| Blautia                                                                                                           | 0.46                       | 0.92                     | 667.00           | 553.38                  |
| Lactobacillus                                                                                                     | 0.49                       | 0.92                     | 201.50           | 145.13                  |
| Bacteroides                                                                                                       | 0.56                       | 0.92                     | 1150.88          | 1325.75                 |
| Bifidobacterium                                                                                                   | 0.59                       | 0.92                     | 248.75           | 340.00                  |
| Coprococcus                                                                                                       | 0.67                       | 0.92                     | 438.88           | 413.88                  |
| Ruminococcus                                                                                                      | 0.67                       | 0.92                     | 601.13           | 376.25                  |
| Catenibacterium                                                                                                   | 0.74                       | 0.92                     | 238.75           | 295.13                  |
| Dialister                                                                                                         | 0.75                       | 0.92                     | 471.50           | 259.50                  |
| [Ruminococcus]                                                                                                    | 0.75                       | 0.92                     | 271.00           | 223.25                  |

Supporting Information for “**The TLR9 agonist MGN1703 triggers a potent type I interferon response in the sigmoid colon**” by Krarup, Abdel-Mohsen, Schleimann, *et al.*

| <b>Table S2 (continued on multiple pages). Fecal relative abundance of sequences derived from individual taxa</b> |                            |                          |                  |                         |
|-------------------------------------------------------------------------------------------------------------------|----------------------------|--------------------------|------------------|-------------------------|
| <b>Taxonomic Rank</b>                                                                                             | <b>P-Value<sup>a</sup></b> | <b>FDR-P<sup>b</sup></b> | <b>BL # Seqs</b> | <b>Treatment # Seqs</b> |
| Faecalibacterium                                                                                                  | 0.75                       | 0.92                     | 1147.25          | 1069.25                 |
| Megasphaera                                                                                                       | 0.82                       | 0.92                     | 153.75           | 140.13                  |
| Prevotella                                                                                                        | 0.87                       | 0.92                     | 686.13           | 825.25                  |
| Succinivibrio                                                                                                     | 0.91                       | 0.92                     | 408.00           | 702.50                  |
| Collinsella                                                                                                       | 0.92                       | 0.92                     | 280.00           | 255.75                  |
| [Eubacterium]                                                                                                     | 0.92                       | 0.92                     | 212.00           | 262.25                  |

# Seqs = average number of sequences in defined group.  
 Table is sorted by P-Value for each taxonomic rank.  
 Kruskal-Wallis non-parametric one-way analysis of variance.  
<sup>a</sup>P-value :  $P < 0.05$ ; <sup>b</sup>False Discovery Rate:  $FDR-P < 0.05$



Supporting Information for “The TLR9 agonist MGN1703 triggers a potent type I interferon response in the sigmoid colon” by Krarup, Abdel-Mohsen, Schleimann, *et al.*

**Table S3. Fecal alpha diversity indices**

| Comparison     | Taxonomic level | Alpha Diversity Index       | P-value <sup>a</sup>     | Mean±SD (BL)  | Mean±SD (Treatment) |
|----------------|-----------------|-----------------------------|--------------------------|---------------|---------------------|
| BL v Treatment | Phylum          | Shannon (log-e)             | 0.109                    | 0.86 ± 0.26   | 1.01 ± 0.22         |
| BL v Treatment | Class           | Shannon (log-e)             | <b>0.027<sup>a</sup></b> | 1.13 ± 0.27   | 1.34 ± 0.23         |
| BL v Treatment | Order           | Shannon (log-e)             | <b>0.033<sup>a</sup></b> | 1.14 ± 0.29   | 1.35 ± 0.23         |
| BL v Treatment | Family          | Shannon (log-e)             | <b>0.031<sup>a</sup></b> | 2.10 ± 0.27   | 2.26 ± 0.31         |
| BL v Treatment | Genus           | Shannon (log-e)             | 0.230                    | 2.78 ± 0.24   | 2.87 ± 0.34         |
| <hr/>          |                 |                             |                          |               |                     |
| BL v Treatment | Phylum          | Simpson (1-λ)               | 0.148                    | 0.43 ± 0.15   | 0.51 ± 0.11         |
| BL v Treatment | Class           | Simpson (1-λ)               | 0.085                    | 0.52 ± 0.13   | 0.61 ± 0.08         |
| BL v Treatment | Order           | Simpson (1-λ)               | 0.087                    | 0.52 ± 0.13   | 0.61 ± 0.84         |
| BL v Treatment | Family          | Simpson (1-λ)               | <b>0.048<sup>a</sup></b> | 0.81 ± 0.05   | 0.84 ± 0.04         |
| BL v Treatment | Genus           | Simpson (1-λ)               | 0.641 <sup>^</sup>       | 0.90 ± 0.02   | 0.90 ± 0.04         |
| <hr/>          |                 |                             |                          |               |                     |
| BL v Treatment | Phylum          | Evenness (Pielou's)         | 0.098                    | 0.37 ± 0.11   | 0.44 ± 0.08         |
| BL v Treatment | Class           | Evenness (Pielou's)         | <b>0.028<sup>a</sup></b> | 0.40 ± 0.09   | 0.47 ± 0.08         |
| BL v Treatment | Order           | Evenness (Pielou's)         | <b>0.013<sup>a</sup></b> | 0.36 ± 0.08   | 0.42 ± 0.07         |
| BL v Treatment | Family          | Evenness (Pielou's)         | 0.071                    | 0.56 ± 0.06   | 0.59 ± 0.075        |
| BL v Treatment | Genus           | Evenness (Pielou's)         | 0.588                    | 0.65 ± 0.03   | 0.66 ± 0.08         |
| <hr/>          |                 |                             |                          |               |                     |
| BL v Treatment | Phylum          | Species Richness (Margalef) | 0.892 <sup>^</sup>       | 10.38 ± 2.77  | 10.25 ± 2.19        |
| BL v Treatment | Class           | Species Richness (Margalef) | 0.832 <sup>^</sup>       | 17.86 ± 5.17  | 18.50 ± 4.81        |
| BL v Treatment | Order           | Species Richness (Margalef) | 0.689                    | 25.50 ± 7.58  | 26.38 ± 7.05        |
| BL v Treatment | Family          | Species Richness (Margalef) | 0.312                    | 44.75 ± 11.06 | 48.13 ± 9.23        |
| BL v Treatment | Genus           | Species Richness (Margalef) | 0.439                    | 73.30 ± 17.30 | 77.00 ± 10.94       |

Data assessed across groups for normality (histograms, skewness/kurtosis, & Shapiro-Wilk test).  
P-value<sup>a</sup> = P < 0.05: paired *t*-test or (^) non-parametric Wilcoxon signed paired rank *t*-test.  
SD = Standard Deviation, BL=baseline before treatment, Treatment=end time point after treatment.

Supporting Information for “**The TLR9 agonist MGN1703 triggers a potent type I interferon response in the sigmoid colon**” by Krarup, Abdel-Mohsen, Schleimann, *et al.*

| Target | Antigen Retrieval Buffer                                                                         | Primary Antibody                                              | Secondary Antibody                                     |
|--------|--------------------------------------------------------------------------------------------------|---------------------------------------------------------------|--------------------------------------------------------|
| CXCL10 | Citrate Buffer, Sigma Aldrich Cat. # C9999 or Golden Bridge International Labs Cat. # B05C-100B. | Clone 33036 at 1:100 dilution, R&D Systems cat. # AF-266-NA   | Anti-goat conjugated to HRP – GBI Labs cat. #D43-18    |
| IL-21  | Diva Decloaker, Biocare Medical Cat. # DV2004MX                                                  | Polyclonal at 1:800 dilution, LSBio cat. # LS-B1364           | Anti-rabbit conjugated to HRP – GBI Labs cat. #D39-18  |
| ISG-15 | Citraconic Anhydride, Sigma Aldrich Cat. # 125318-100G                                           | Polyclonal at 1:250 dilution, Sigma Aldrich cat. # HPA004627  | Anti-rabbit conjugated to HRP – GBI Labs cat. #D13-110 |
| MX1    | Citraconic Anhydride, Sigma Aldrich Cat. # 125318-100G                                           | Unspecified clone at 1:1000 dilution from Freiburg University | Anti-mouse conjugated to HRP – GBI Labs cat. #D37-18   |
| MPO    | Citrate Buffer, Sigma Aldrich Cat. # C9999 or Golden Bridge International Labs Cat. # B05C-100B. | Polyclonal at 1:1000 dilution, Dako cat. # A0398              | Anti-rabbit conjugated to HRP – GBI Labs cat. #D13-110 |

Supporting Information for “The TLR9 agonist MGN1703 triggers a potent type I interferon response in the sigmoid colon” by Krarup, Abdel-Mohsen, Schleimann, *et al.*

| <b>Table S5. Quality Control of quantification strategy - C1 vs. C2*.</b>                                                                                                                                                                                                                                    |                   |            |                          |
|--------------------------------------------------------------------------------------------------------------------------------------------------------------------------------------------------------------------------------------------------------------------------------------------------------------|-------------------|------------|--------------------------|
| Target                                                                                                                                                                                                                                                                                                       | Linear regression | t test     | Bland-Altman plot        |
| CXCL10                                                                                                                                                                                                                                                                                                       | $r^2 = 0.77$      | $p = 0.39$ | Bias = -968.3; SD = 1346 |
| IL-21                                                                                                                                                                                                                                                                                                        | $r^2 = 0.95$      | $p = 0.91$ | Bias = 13.9; SD = 66.88  |
| ISG-15                                                                                                                                                                                                                                                                                                       | $r^2 = 0.73$      | $p = 0.75$ | Bias = -77.9; SD = 297.1 |
| MX1                                                                                                                                                                                                                                                                                                          | $r^2 = 0.74$      | $p = 0.77$ | Bias = 219.2; SD = 927.5 |
| MPO                                                                                                                                                                                                                                                                                                          | $r^2 = 0.94$      | $p = 0.93$ | Bias = -7.3; SD = 55.16  |
| *Count 1 (C1) and Count 2 (C2) values for each marker were plotted in C1/C2 plots and linear regressions were performed. In addition, C1 and C2 values were compared using a t-test, and a Bland-Altman plot was generated using the average of the two counts versus the difference between the two counts. |                   |            |                          |

## SUPPLEMENTAL FIGURE 1

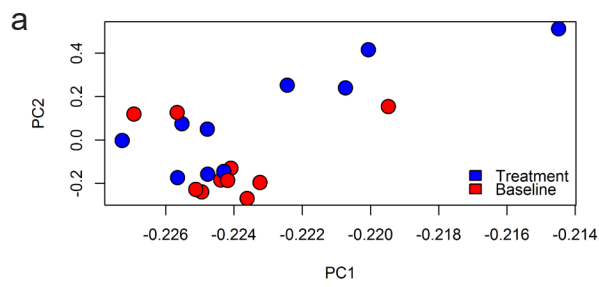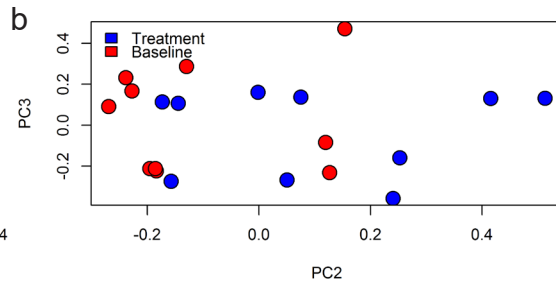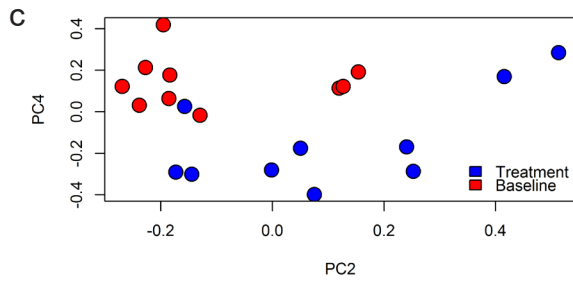

**Principal component analysis revealed that MGN1703 treatment is associated with differential gene expression patterns in the sigmoid colon.** (a-c) Principal component scores plots for the first four components: PC1 vs. PC2 (a); PC2 vs. PC3 (b) and PC2 vs. PC4 (c). Samples collected at baseline are represented by red circles and samples collected during treatment are represented by blue circles.

## SUPPLEMENTAL FIGURE 2

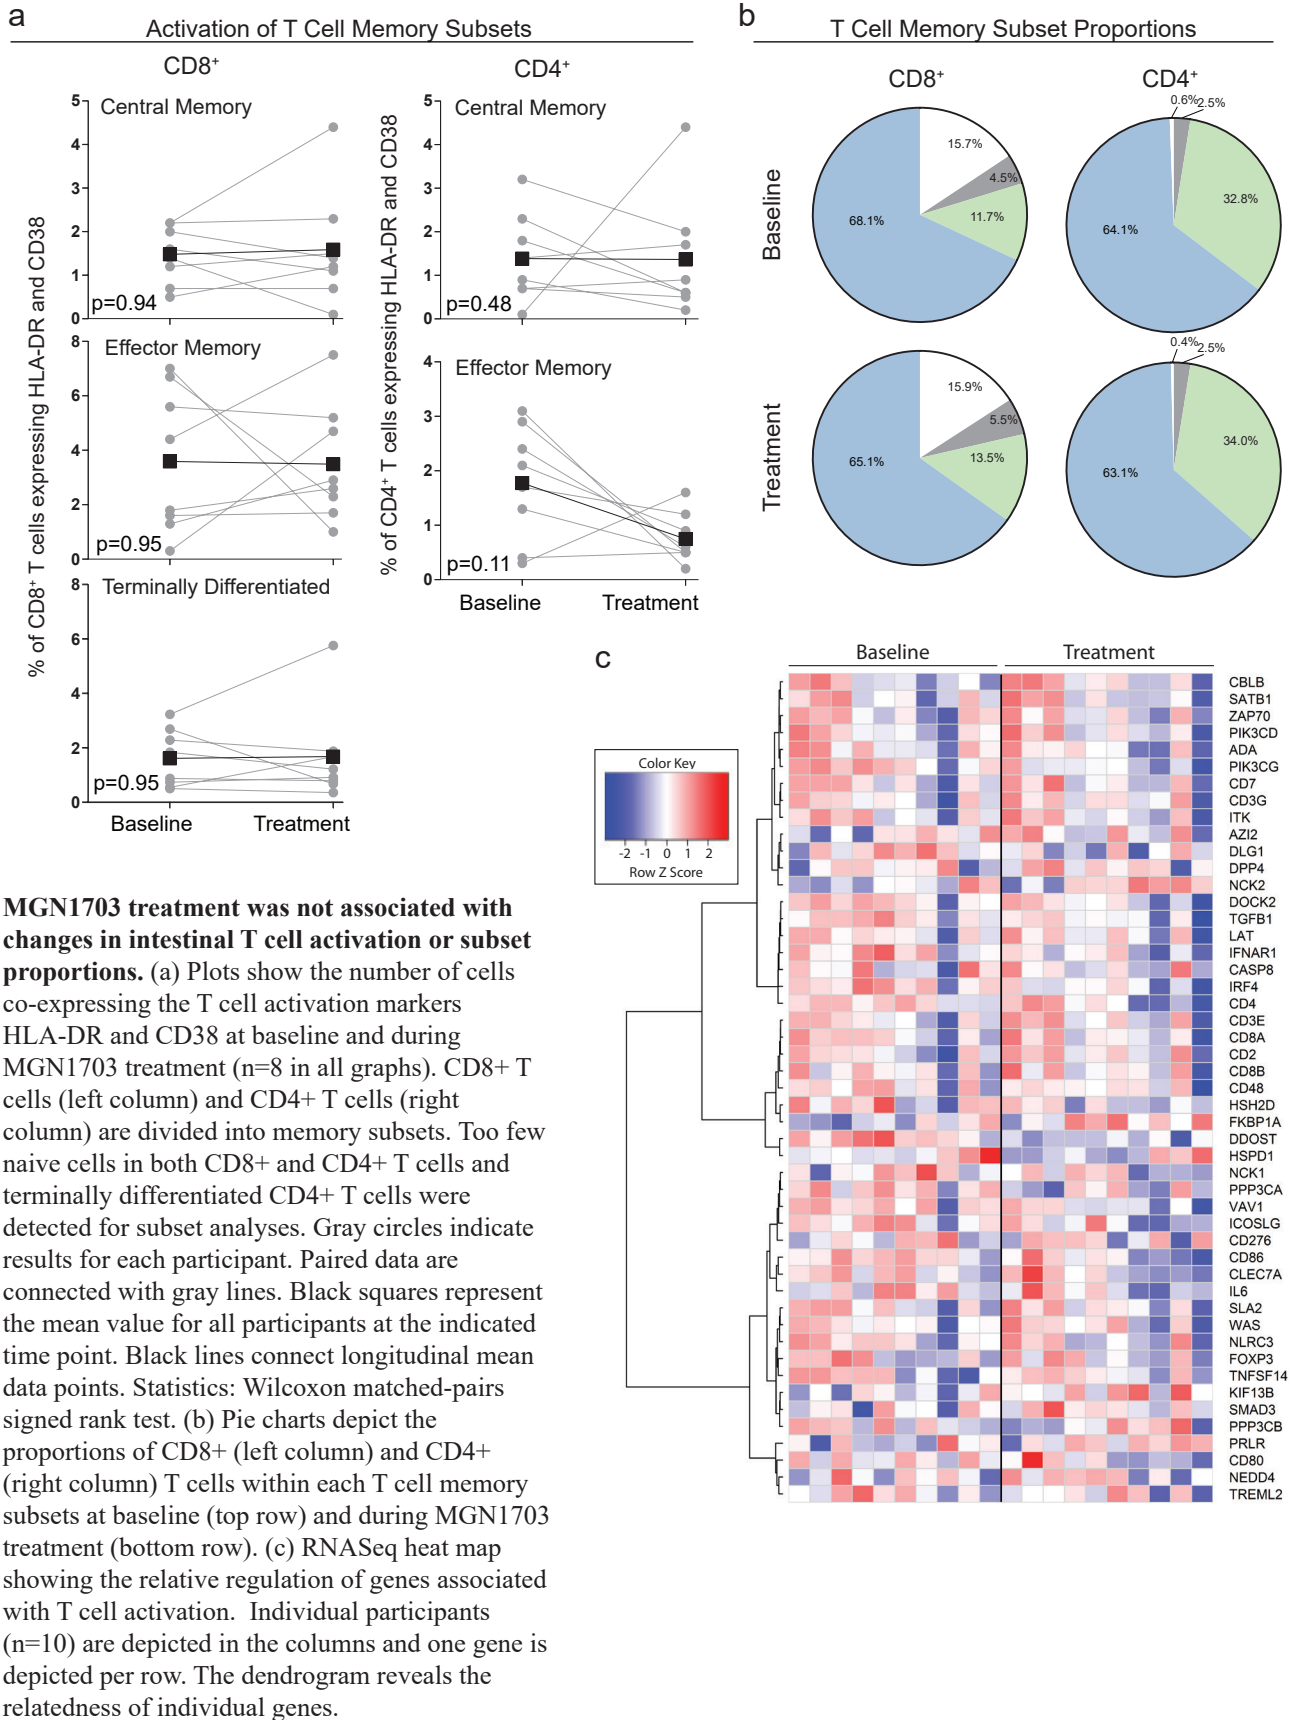

Supplement: NIHMS880398-supplement-supplement_1.pdf [file NIHMS880398-supplement-supplement_1.pdf]
